# Supplementary material
Source: PubMed Central journal article supplement (PMC3974903)
Supplement: NIHMS558945-supplement-01.pdf [file NIHMS558945-supplement-01.pdf]

**Structure, Volume 22**

**Supplemental Information**

**Structural Basis for PI(4)P-Specific Membrane**

**Recruitment of the *Legionella pneumophila***

**Effector DrrA/SidM**

**Claudia M. Del Campo, Ashwini K. Mishra, Yu-Hsiu Wang, Craig R. Roy, Paul A. Janmey, and David G. Lambright**

## Supplemental Figures

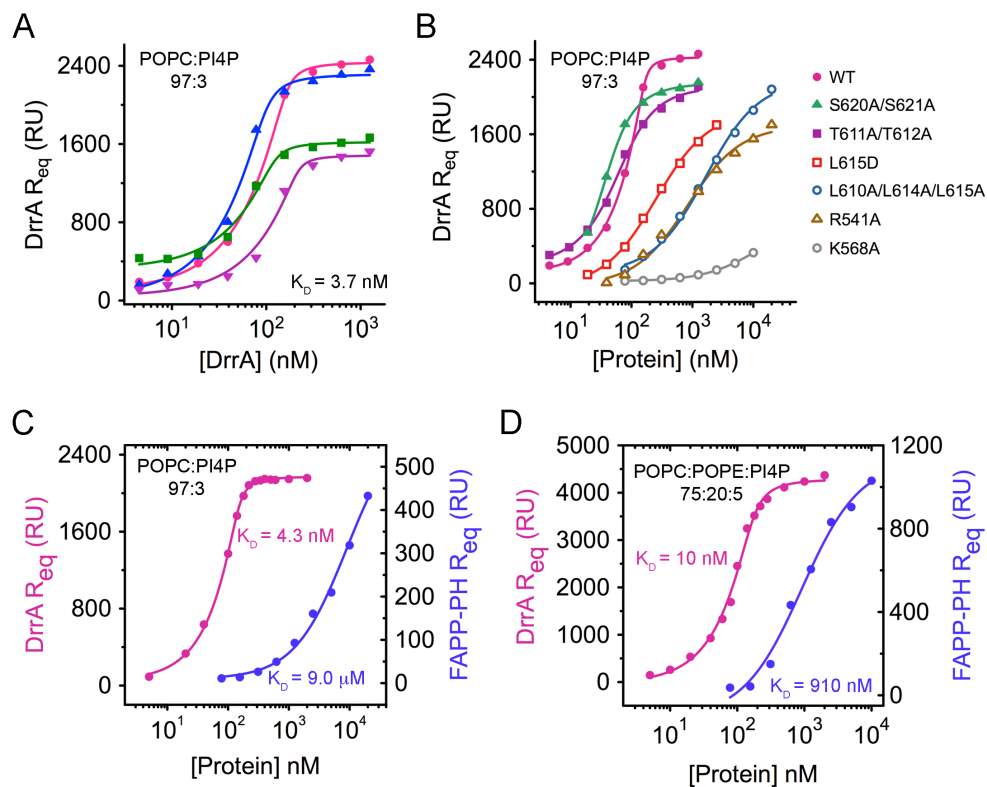

**Figure S1 related to Figure 1 and 4.** Analysis of equilibrium SPR responses for binding to PI(4)P-containing liposomes as a function of protein concentration. (A) Global fit of the quadratic binding model for four independent experiments with DrrA WT. Solid lines represent quadratic binding models with  $K_D$  treated as a global parameter and [PI4P],  $R_{max}$ , and  $R_{min}$  treated as local parameters (see also Figure 1B). (B) Fit of the quadratic binding model to WT and tight binding mutants ( $K_D < 50$  nM, filled symbols) and of the Langmuir binding model to weak binding mutants ( $K_D > 200$  nM, open symbols),  $K_D$  values for these mutants are included in Table S2. (C - D) Equilibrium responses and  $K_D$  values for DrrA and the FAPP1 PH domain (FAPP-PH; residues 1-98) fit with the quadratic and Langmuir binding models, respectively, under two different lipid compositions.

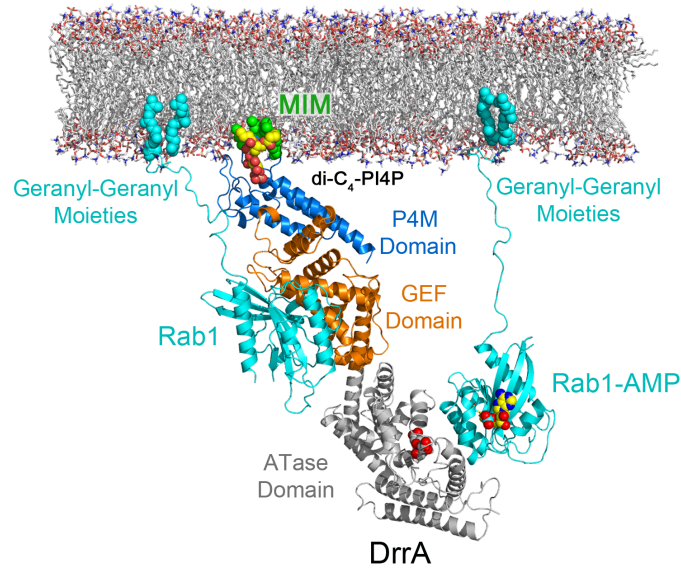

**Figure S2 related to Figure 6.** Structure-based membrane targeting model for full length DrrA. A composite model for full length DrrA with nucleotide free Rab1 was constructed and docked with a simulated POPC bilayer as described in the discussion. Rab1-AMP was modeled in a hypothetical orientation in which the AMPylated tyrosine is near the catalytic residues in the ATase domain. The hypervariable C-termini of Rab1 and Rab1-AMP were modeled in arbitrary conformations compatible with membrane insertion of the prenyl groups.

**Table S1 related to Figure 1.** Dissociation constant ( $K_D$ ) for binding of DrrA<sub>321-647</sub> and eukaryotic PI(4)P-binding domains to PI(4)P-containing liposomes determined by SPR

| Protein  | $K_D$ ( $\mu$ M)    | Reference               |
|----------|---------------------|-------------------------|
| DrrA     | $0.0038 \pm 0.0027$ | This study              |
| Bem1p-PX | $1.2 \pm 0.10$      | (Stahelin et al., 2007) |
| OSBP-PH  | $0.10 \pm 0.020$    | (Stahelin et al., 2007) |
| GOLPH3   | $2.6 \pm 0.20$      | (Wood et al., 2009)     |
| Vps74    | $8.9 \pm 0.30$      | (Wood et al., 2009)     |
| FAPP1-PH | $0.46 \pm 0.080$    | (He et al., 2011)       |

**Table S2 related to Figure 4.** Dissociation constant ( $K_D$ ) for binding of DrrA<sub>321-647</sub> wild type (WT) and mutants to POPC liposomes containing 3% PI(4)P determined by SPR (See also Figure S1B)

| DrrA <sub>321-647</sub> | $K_D$ ( $\mu$ M)*   | $K_D$ (arb. units) | Fitted binding model |
|-------------------------|---------------------|--------------------|----------------------|
| WT                      | $0.0038 \pm 0.0027$ | 1.0                | Quadratic            |
| K568A                   | $9.8 \pm 2.5$       | 2600               | Langmuir             |
| R541A                   | $0.77 \pm 0.086$    | 210                | Langmuir             |
| Y532A                   | $0.55 \pm 0.16$     | 150                | Langmuir             |
| Q608R                   | $1.04 \pm 0.022$    | 280                | Langmuir             |
| S620A/S621A             | $0.0095 \pm 0.0019$ | 2.5                | Quadratic            |
| T611A/T612A             | $0.031 \pm 0.0090$  | 8.3                | Quadratic            |
| L610A                   | $0.014 \pm 0.0023$  | 3.6                | Quadratic            |
| L617A                   | $0.023 \pm 0.0028$  | 6.1                | Quadratic            |
| L614A/L615A             | $0.34 \pm 0.058$    | 91                 | Langmuir             |
| L610A/L614A/L615A       | $1.7 \pm 0.29$      | 440                | Langmuir             |
| L610D                   | $0.23 \pm 0.047$    | 62                 | Langmuir             |
| L614D/L615D             | $6.2 \pm 0.16$      | 1600               | Langmuir             |

\* Values are mean  $\pm$  standard deviation for 2-4 independent experiments.

**Table S3 related to Figure 4.** Thermodynamic analysis of DrrA<sub>321-647</sub> wild type (WT) and mutants binding to the soluble analogs di-C<sub>4</sub>-PI(4)P and Ins(1,4)P<sub>2</sub> determined by ITC<sup>§</sup>

| Protein                   | K <sub>D</sub><br>(μM) | ΔH<br>(kcal/mol) | ΔG<br>(kcal/mol) | -TΔS<br>(kcal/mol) | K <sub>D</sub><br>(arb. units) |
|---------------------------|------------------------|------------------|------------------|--------------------|--------------------------------|
| di-C <sub>4</sub> -PI(4)P |                        |                  |                  |                    |                                |
| WT                        | 0.056 ± 0.011          | -31 ± 1.2        | -10 ± 0.12       | 21 ± 1.2           | 1                              |
| S620A/S621A               | 5.8 ± 0.57             | -17 ± 1.0        | -7.1 ± 0.057     | 10 ± 0.93          | 104                            |
| T611A/T612A               | 0.93 ± 0.042           | -25 ± 1.4        | -8.1 ± 0.027     | 17 ± 1.4           | 17                             |
| L610A                     | 0.064 ± 0.0057         | -34 ± 0.71       | -10 ± 0.052      | 24 ± 0.76          | 1                              |
| L614A/L615A               | 0.80 ± 0.11            | -28 ± 1.5        | -8.2 ± 0.076     | 20 ± 1.5           | 14                             |
| L610A/L614A/L615A         | 0.60 ± 0.092           | -31 ± 2.1        | -8.4 ± 0.091     | 22 ± 2.0           | 11                             |
| L610D                     | 0.25 ± 0.014           | -32 ± 3.5        | -8.9 ± 0.033     | 23 ± 3.5           | 4                              |
| L614D/L615D               | 9.5 ± 1.4              | -33 ± 4.2        | -6.8 ± 0.088     | 26 ± 4.2           | 170                            |
| L610D/L614D/L615D         | 15 ± 3.6               | -25 ± 0.00       | -6.5 ± 0.14      | 19 ± 0.14          | 276                            |
| Ins(1,4)P <sub>2</sub>    |                        |                  |                  |                    |                                |
| WT                        | 2.1 ± 0.31             | -28 ± 4.6        | -7.7 ± 0.12      | 20 ± 4.7           | 1                              |
| T611A/T612A               | 140 ± 30               | -28 ± 0.71       | -5.2 ± 0.12      | 22 ± 0.83          | 69                             |
| L610A                     | 2.1 ± 0.064            | -28 ± 0.00       | -7.7 ± 0.017     | 20 ± 0.017         | 1                              |
| L614A/L615A               | 18 ± 0.71              | -28 ± 0.71       | -6.4 ± 0.024     | 21 ± 0.73          | 9                              |
| L610A/L614A/L615A         | 13 ± 0.85              | -29 ± 0.71       | -6.6 ± 0.038     | 22 ± 0.67          | 6                              |
| L610D                     | 9.7 ± 2.1              | -25 ± 3.5        | -6.8 ± 0.13      | 18 ± 3.7           | 5                              |

<sup>§</sup> Values are mean ± standard deviation 2-3 independent measurement. No heat was detected for binding of dibutyl-PI(4)P to K568A, Y532A, and R541A.

## Supplemental Experimental Procedures

### Materials

Phospholipids, 1-palmitoyl-2-oleoyl-sn-glycero-3-phosphocholine (POPC) and 1-palmitoyl-2-oleoyl-sn-glycero-3-phospho-L-serine (POPS) were from Avanti, di-C<sub>16</sub>-phosphatidyl-inositol-polyphosphates from Cell Signals, dibutanoyl-phosphatidyl-inositol-4-phosphate (dibutyl PI(4)P) and *D-myo*-inositol 1,4-bisphosphate (Ins(1,4)P<sub>2</sub>) from Echelon. For membrane insertion studies, natural PI(4,5)P<sub>2</sub> (porcine brain L- $\alpha$ -phosphatidyl-inositol-4,5-bisphosphate) and neutral phospholipids such as DOPC (1,2-dioleoyl-sn-glycero-3-phosphocholine) and Rho-DOPE (1,2-dioleoyl-sn-glycero-3-phosphoethanolamine-N-(lissamine rhodamine B sulfonyl)) were from Avanti. Phosphatidylinositol-4-phosphate diC16 (PI(4)P diC16) was from Echelon Biosciences. The concentrations of unlabeled lipid stock solutions were routinely monitored by a phosphorus assay (Rouser et al., 1970). Subphase reagents 4-(2-hydroxyethyl)-1-piperazineethanesulfonic acid (HEPES), ethylenediamine-tetraacetic acid (EDTA), CaCl<sub>2</sub>, and KCl were from Fisher Scientific.

### Constructs, Expression and Purification

Constructs were amplified with Vent polymerase and ligated into a modified pET15b vector incorporating an N-terminal 6 $\times$ His tag (MGHHHHHHGS). Site-specific mutants were generated with the QuickChange II XL kit (Stratagene). Wild type and mutated constructs were confirmed by sequencing. Constructs were expressed in BL21(DE3)RIPL cells (Stratagene) cultured in 2 $\times$ YT-amp (16 g tryptone, 10 g yeast extract, 5 g NaCl, and 100 mg ampicillin per liter) at 37°C to an OD<sub>600</sub> of 0.2, then at

21°C to an OD<sub>600</sub> of 0.4, and induced with 50 mM IPTG for 16 h. Cells resuspended in lysis buffer (50 mM Tris, pH 8.0, 0.1M NaCl, 0.1% 2-mercaptoethanol) were disrupted by sonication in the presence of 0.1 mM PMSF, 0.2 mg/ml lysozyme, and 0.01 mg/ml protease free DNase I (Worthington). Lysates were supplemented with 0.5% Triton X-100 and centrifuged at 35,000×g for 1 h. Supernatants were added to Ni-NTA-Sepharose (GE Healthcare) equilibrated with lysis buffer and nutated for 15 min at 4°C. The beads were washed extensively with buffer containing 50 mM Tris, pH 8.0, 50 mM imidazole, 0.5 M NaCl, and 0.1% 2-mercaptoethanol. Proteins were eluted with 300 mM imidazole and further purified by ion exchange on HiTrap S or Q (GE Health Care) with gradients of 0-1M NaCl, followed by gel filtration on Superdex-75 (GE Health Care).

### **Supplemental References**

Rouser, G., Fleische.S, and Yamamoto, A. (1970). Two dimensional thin layer chromatographic separation of polar lipids and determination of phospholipids by phosphorus analysis of spots. *Lipids* 5, 494-6.
